# Supplementary material for: 3D in vitro co-culture disc for spatiotemporal image analysis of cancer–stromal cell interaction
Source: Royal Society of Chemistry journal article supplement (doi:10.1039/d1bm00629k), 2021-01-01
Supplement: d1bm00629k3.pdf [file d1bm00629k3.pdf]

## Electronic Supplementary Information (ESI)

### **3D *in vitro* co-culture disc for spatiotemporal image analysis of cancer-stromal cell interaction**

Haruko Takahashi\* and Yutaka Kikuchi\*

Graduate School of Integrated Sciences for Life, Hiroshima University, 1-3-1 Kagamiyama, Higashi-Hiroshima, Hiroshima 739-8526, Japan.

E-mail: harukot@hiroshima-u.ac.jp and yutaka@hiroshima-u.ac.jp

#### **Table of contents**

1. Preparation of A549 spheroids in the spheroid forming plate
2. Culture of NHLFs in the collagen gel on glass bottom dish
3. Long term co-culture of A549 spheroid and NHLF in the 3D *in vitro* co-culture disc
4.  $\alpha$ SMA gene expression under nicotine treatment
5. Caption for MovieS1

## 1. Preparation of A549 spheroids in the spheroid forming plate

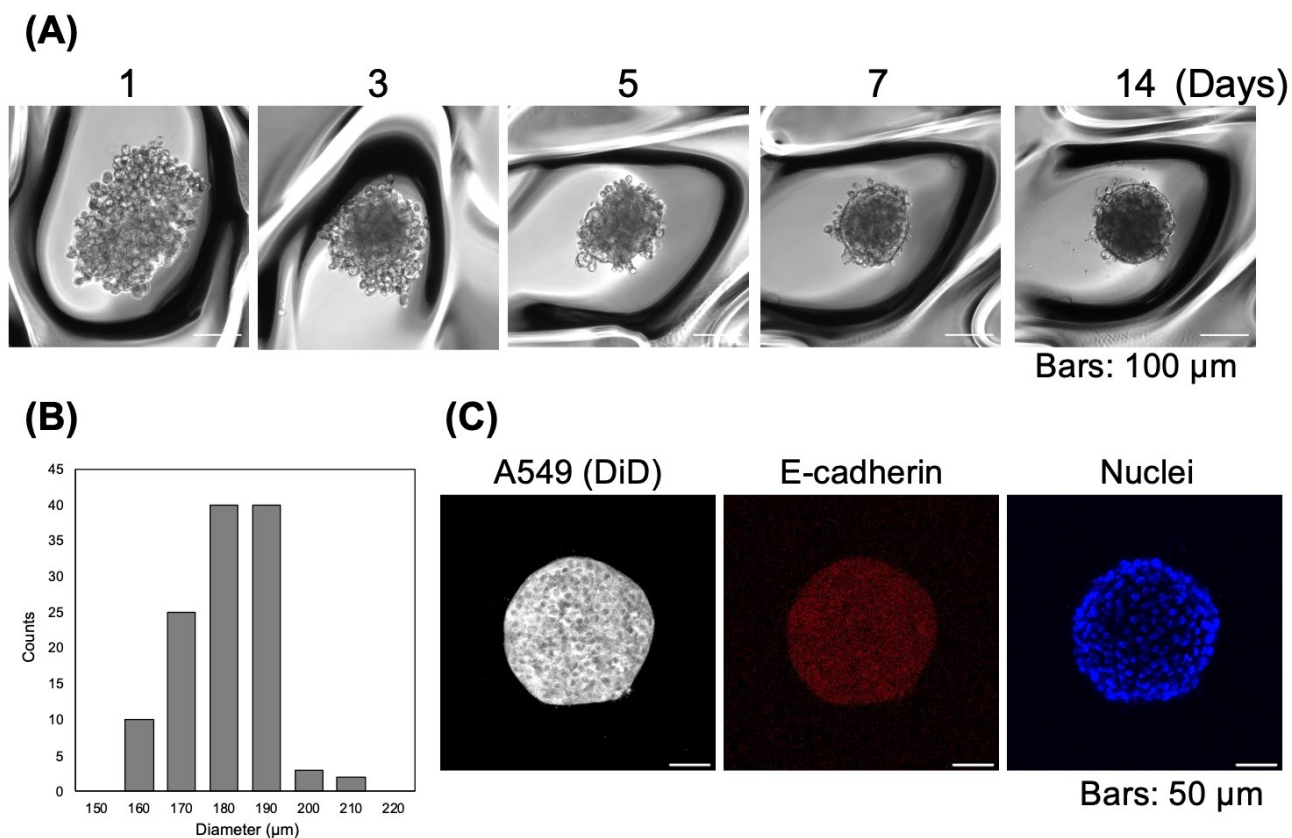

**Figure S1. Preparation of A549 spheroids in the spheroid forming plate.** (A) A549 spheroid formation in the low cell adhesive spheroid forming plate. (B) Size distribution of prepared A549 spheroid after 7-day incubation. (C) Immunostaining of A549 spheroid after 7-day incubation. A549 cells were stained by DiD (white signal). E-cadherin (red signal) was detected by immunostaining. The nuclei (blue signal) were stained by Hoechst 33342. Bars: 50  $\mu\text{m}$ .

## 2. Culture of NHLFs in the collagen gel on glass bottom dish

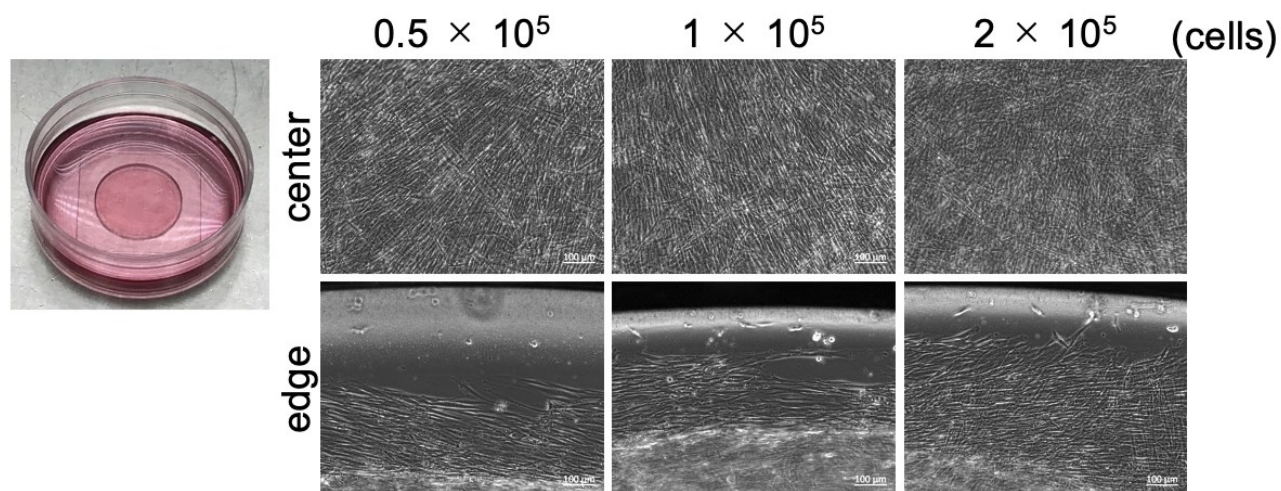

**Figure S2. Culture of NHLFs on the glass bottom dish.** (Left) Appearance of glass bottom dish. On the center groove ( $\phi$ 14 mm), the NHLFs in the collagen solution were applied to form collagen gel. (Right) Center and edge part of glass bottom dish after 10 days incubation.

## 3. Long term co-culture of A549 spheroid and NHLF in the 3D *in vitro* co-culture disc

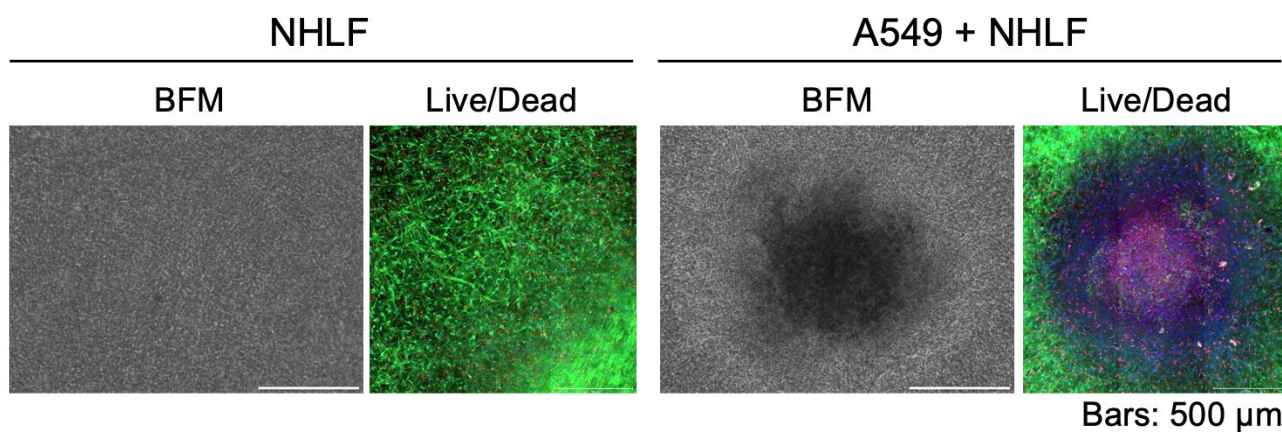

**Figure S3. Long co-culture of A549 spheroid and NHLF in the 3D *in vitro* co-culture disc.** After 30 days co-culture, the cells were observed by BFM or confocal laser scanning microscope images of discs stained with the LIVE/DEAD™ kit. By the LIVE/DEAD™ staining, living cells was shown with green fluorescent signal due to Calcein-AM and dead cells were stained EthD-1 with red fluorescent. The nuclei (blue signal) were stained by Hoechst 33342.

#### 4. $\alpha$ SMA gene expression under nicotine treatment

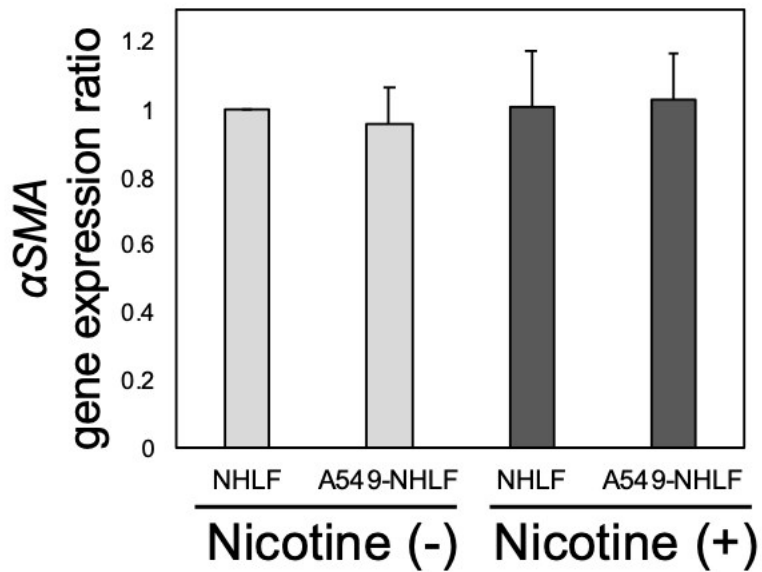

Figure S4.  $\alpha$ SMA gene expression ratio (compare to non-treated NHLF) under nicotine treatment determined by RT-qPCR. The cells were collected from collagen gel of disc (n=3). [Nicotine] = 10  $\mu$ M.

#### 5. Caption for MovieS1

Movie S1. Time-lapse imaging of A549-NHLF interaction in the 3D *in vitro* co-culture corresponding to Figure 4.
